# Supplementary material for: Synthesis of 1,4-Bis(phenylethynyl)benzenes and Their Application as Blue Phase Liquid Crystal Composition
Source: MDPI journal article supplement (doi:10.3390/ijms141223257), 2013-11-25
Supplement: s1 [file s1]

## Supplementary Information

**Scheme S1.** Preparation of 2,6-difluoro-4-*n*-propylphenyl acetylene (**12c**).

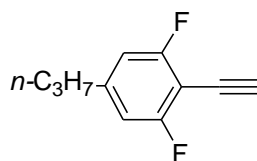

**Scheme S2.** Preparation of [2,6-difluoro-4-(2',6'-difluoro-4'-*n*-propylphenyl)ethynyl]phenyl acetylene (**12g**).

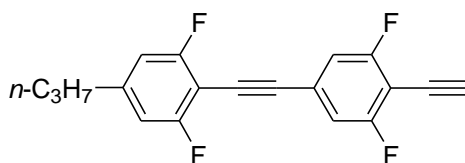

**Scheme S3.** Preparation of 1-[(2',6'-difluoro-4'-*n*-propylphenyl)ethynyl]-4-[(3'',5''-difluoro-4''-trifluoro-methoxy-phenyl)ethynyl]-3,5-difluorobenzene (**BPEB 12**).

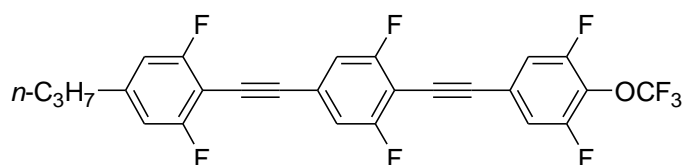

© 2013 by the authors; licensee MDPI, Basel, Switzerland. This article is an open access article distributed under the terms and conditions of the Creative Commons Attribution license (<http://creativecommons.org/licenses/by/3.0/>).
